# Supplementary material for: Fabrication of nitrogen-rich three-dimensional porous carbon composites with nanosheets and hollow spheres for efficient supercapacitors
Source: Royal Society of Chemistry journal article supplement (doi:10.1039/c9qi00536f), 2019-01-01
Supplement: c9qi00536f1.pdf [file c9qi00536f1.pdf]

**Fabrication of nitrogen-rich three-dimensional porous carbon  
composites with nanosheets and hollow spheres for efficient  
supercapacitor**

Jinghua Liu<sup>a</sup>, Xiaohui Ren<sup>a</sup>, Xu Kang<sup>b</sup>, Xiong He<sup>a</sup>, Peicheng Wei<sup>a</sup>, Yan Wen<sup>b</sup> and Xin Li<sup>a,\*</sup>

*<sup>a</sup>MIIT Key Laboratory of Critical Materials Technology for New Energy Conversion and Storage, School of Chemistry and Chemical Engineering, State Key Lab of Urban Water Resource and Environment, Harbin Institute of Technology, Harbin 150090, China.*

*<sup>b</sup>School of Environment, Harbin Institute of Technology, Harbin 150090, China*

\*Corresponding author: Tel.: +86-0451-86282153.

E-mail address: [lixin@hit.edu.cn](mailto:lixin@hit.edu.cn) (X. Li)

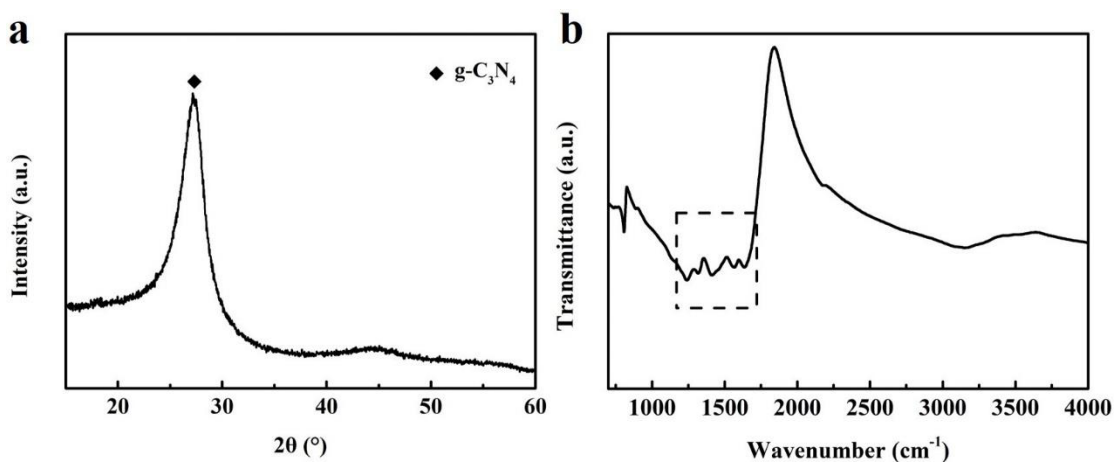

**Fig. S1** (a) XRD pattern, (b) FT-IR spectrum of NCN/NHCS-550.

As shown in Fig. S1a, diffraction peak at  $27.4^\circ$  can be indexed as the respective (002) plane of  $g\text{-C}_3\text{N}_4$ , indicating the presence of  $g\text{-C}_3\text{N}_4$  in the intermediate calcined at  $550\text{ }^\circ\text{C}$ [1]. In addition, the FT-IR spectrum further confirms the existence of  $g\text{-C}_3\text{N}_4$  in the intermediate. As shown in Fig. S1b, the peak at  $810\text{ cm}^{-1}$  is related to the triazine breathing vibration. All of the peaks in the  $1200\text{-}1700\text{ cm}^{-1}$  region are derived from typical C-N heterocyclic stretches of the triazine ( $\text{C}_6\text{N}_7$ ) ring[2]. Absorbance ranging from  $3000\text{ to }3400\text{ cm}^{-1}$  is associated with the N-H and O-H groups, suggesting the formation of  $g\text{-C}_3\text{N}_4$  at  $550\text{ }^\circ\text{C}$ .

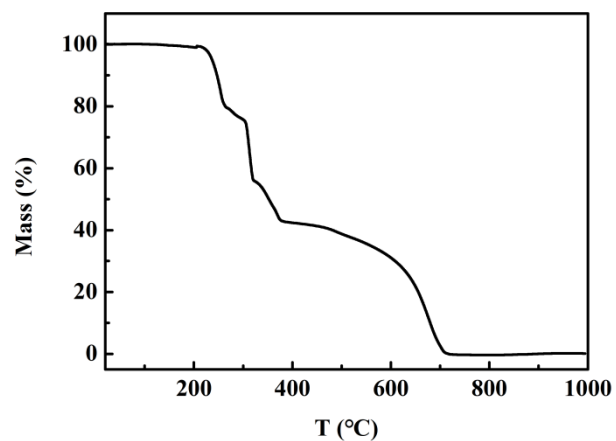

**Fig. S2** TGA curve of DCDA in N<sub>2</sub> from room temperature to 1000 °C.

Fig. S2 shows the TGA curve of DCDA in N<sub>2</sub> atmosphere from room temperature to 1000 °C. It can be seen that DCDA suffers severe mass loss before 720 °C. With increasing the calcination temperature, DCDA gradually transformed to melamine, tris-s-triazine, and g-C<sub>3</sub>N<sub>4</sub> in the range of 210-640 °C. Then, g-C<sub>3</sub>N<sub>4</sub> undergoes thorough decomposition until 720 °C[3].

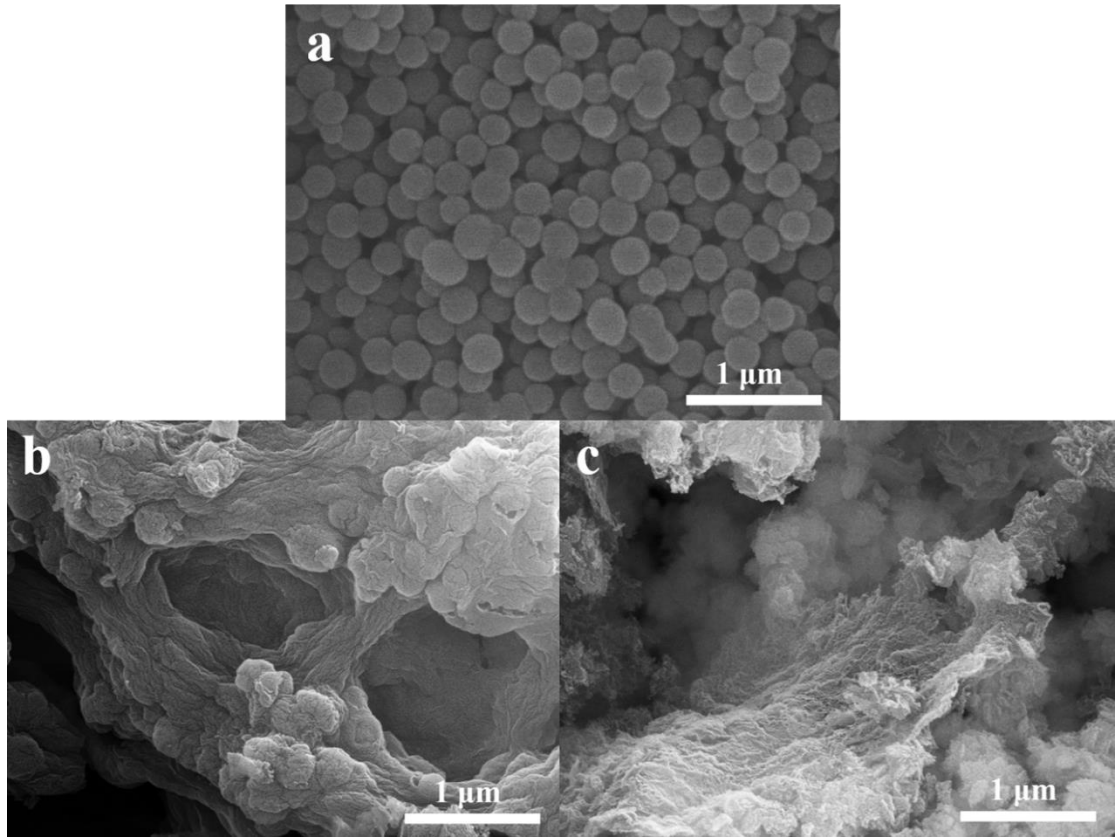

**Fig. S3** SEM image of PDA@SiO<sub>2</sub> (a), NCN/NHCS-700 (b), and NCN/NHCS-900 (c).

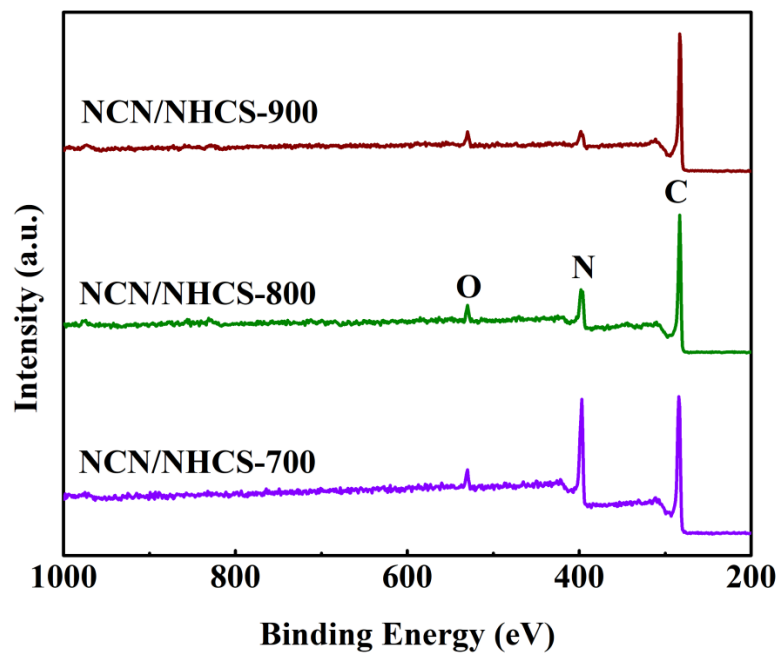

Fig. S4 XPS spectra of NCN/NHCS-Ts.

**Table S1** The content (wt%) of C, N, and O elements in NCN/NHCS-Ts.

| Sample       | C (wt%) | N (wt%) | O (wt%) |
|--------------|---------|---------|---------|
| NCN/NHCS-700 | 63.3    | 32.1    | 4.6     |
| NCN/NHCS-800 | 72.1    | 23.2    | 4.7     |
| NCN/NHCS-900 | 84.6    | 9.6     | 5.8     |

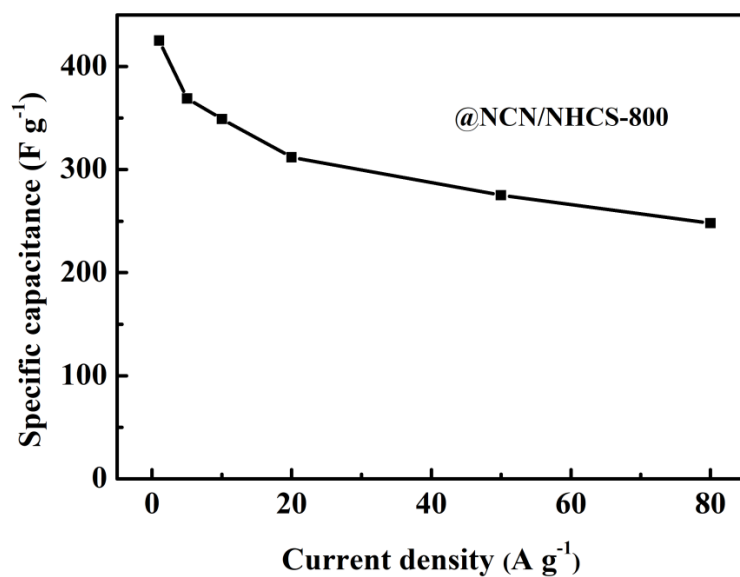

**Fig. S5** Relationship between the specific capacitance and the current densities from 1-80 A g<sup>-1</sup> for NCN/NHCS-800.

**Table S2** Summary of the recently reported N-doped carbon materials and their electrochemical performances in three-electrode configurations.

| Materials                              | V          | Electrolytes                       | Capacitance                                      |
|----------------------------------------|------------|------------------------------------|--------------------------------------------------|
| N-doped mesoporous carbon sheets [4]   | -1 - 0     | 6 M KOH                            | 232 F g <sup>-1</sup> at 0.5 A g <sup>-1</sup>   |
| Porous N-doped carbon [5]              | -1 - 0     | 6 M KOH                            | 350.8 F g <sup>-1</sup> at 1 A g <sup>-1</sup>   |
| N-rich graphene-like carbon sheets [6] | -1 - 0     | 6 M KOH                            | 261 F g <sup>-1</sup> at 1 A g <sup>-1</sup>     |
| Super-hierarchical porous carbons [7]  | -1 - 0     | 6 M KOH                            | 420 F g <sup>-1</sup> at 0.5 A g <sup>-1</sup>   |
| N-doped hollow carbon nanospheres [8]  | 0 - 0.8    | 1 M H <sub>2</sub> SO <sub>4</sub> | 240 F g <sup>-1</sup> at 1 A g <sup>-1</sup>     |
| N-doped mesoporous carbon spheres [9]  | -1 - 0     | 6 M KOH                            | 288 F g <sup>-1</sup> at 0.1 A g <sup>-1</sup>   |
| N-doped carbon polyhedrons/sheets [10] | -0.2 - 0.8 | 1 M H <sub>2</sub> SO <sub>4</sub> | 495.0 F g <sup>-1</sup> at 0.1 A g <sup>-1</sup> |
| N-doped hollow carbon spheres [11]     | -1 - 0     | 6 M KOH                            | 436.5 F g <sup>-1</sup> at 0.5 A g <sup>-1</sup> |
| this work                              | -1.0 - 0   | 6 M KOH                            | 425 F g <sup>-1</sup> at 1 A g <sup>-1</sup>     |



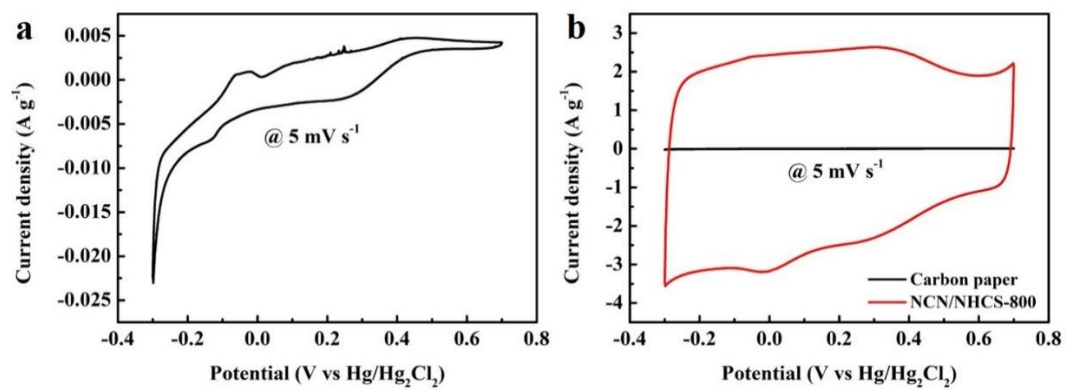

**Fig. S6** (a) CV curve of carbon paper current collector at a scan rate of 5 mV s<sup>-1</sup>, (b) CV curves of carbon paper current collector compared with NCN/NHCS-800 at a scan rate of 5 mV s<sup>-1</sup>.

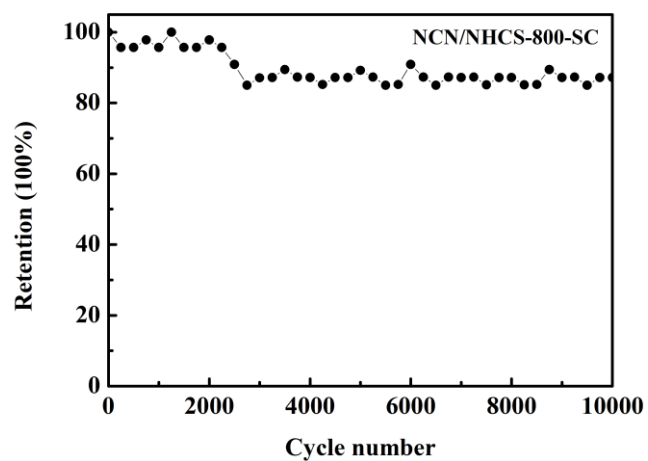

**Fig. S7** Cycling performance of NCN/NHCS-800-SC at the current density of  $10 \text{ A g}^{-1}$  in two-electrode system.

## References

- [1] X.H. Li, S. Kurasch, U. Kaiser, M. Antonietti, Synthesis of Monolayer-Patched Graphene from Glucose, *Angew. Chem.-Int. Edit.* 51(38) (2012) 9689-9692.
- [2] W. Xing, W. Tu, Z. Han, Y. Hu, Q. Meng, G. Chen, Template-induced high-crystalline g-C<sub>3</sub>N<sub>4</sub> nanosheets for enhanced photocatalytic H<sub>2</sub> evolution, *ACS Energy Letters* 3(3) (2018) 514-519.
- [3] A. Thomas, A. Fischer, F. Goettmann, M. Antonietti, J.O. Muller, R. Schlogl, J.M. Carlsson, Graphitic carbon nitride materials: variation of structure and morphology and their use as metal-free catalysts, *Journal of Materials Chemistry* 18(41) (2008) 4893-4908.
- [4] Y.N. Hou, Z.B. Zhao, Z.F. Yu, S. Zhang, S.F. Li, J. Yang, H. Zhang, C. Liu, Z.Y. Wang, J.S. Qiu, Microporous MOFs Engaged in the Formation of Nitrogen-Doped Mesoporous Carbon Nanosheets for High-Rate Supercapacitors, *Chem.-Eur. J.* 24(11) (2018) 2681-2686.
- [5] K.X. Zou, Y.F. Deng, J.P. Chen, Y.Q. Qian, Y.W. Yang, Y.W. Li, G.H. Chen, Hierarchically porous nitrogen-doped carbon derived from the activation of agriculture waste by potassium hydroxide and urea for high-performance supercapacitors, *Journal of Power Sources* 378 (2018) 579-588.
- [6] W. Yang, L.Q. Hou, X.W. Xu, Z.H. Li, X.L. Ma, F. Yang, Y.F. Li, Carbon nitride template-directed fabrication of nitrogen-rich porous graphene-like carbon for high performance supercapacitors, *Carbon* 130 (2018) 325-332.
- [7] L. Peng, Y.R. Liang, H.W. Dong, H. Hu, X. Zhao, Y.J. Cai, Y. Xiao, Y.L. Liu, M.T. Zheng, Super-hierarchical porous carbons derived from mixed biomass wastes by a stepwise removal strategy for high-performance supercapacitors, *Journal of Power Sources* 377 (2018) 151-160.
- [8] C. Liu, J. Wang, J. Li, M. Zeng, R. Luo, J. Shen, X. Sun, W. Han, L. Wang, Synthesis of N-doped hollow-structured mesoporous carbon nanospheres for high-performance supercapacitors, *ACS applied materials & interfaces* 8(11) (2016) 7194-7204.
- [9] J.G. Wang, H.Z. Liu, H.H. Sun, W. Hua, H.W. Wang, X.R. Liu, B.Q. Wei, One-pot synthesis of nitrogen-doped ordered mesoporous carbon spheres for high-rate and long-cycle life supercapacitors, *Carbon* 127 (2018) 85-92.
- [10] L.R. Kong, Q.R. Chen, X.P. Shen, Z.Y. Xu, C. Xu, Z.Y. Ji, J. Zhu, MOF derived nitrogen-doped carbon polyhedrons decorated on graphitic carbon nitride sheets with enhanced electrochemical capacitive energy storage performance, *Electrochimica Acta* 265 (2018) 651-661.
- [11] J. Du, L. Liu, Y. Yu, Z. Hu, Y. Zhang, B. Liu, A. Chen, Tuning Confined Nanospace for Preparation of N-doped Hollow Carbon Spheres for High Performance Supercapacitors, *ChemSusChem* 12(1) (2019) 303-309.
